# Supplementary material for: Pass Rates of Return to Sport Test Batteries Following Anterior Cruciate Ligament Reconstruction: A Systematic Review and Meta-Analysis
Source: MDPI journal article supplement (doi:10.3390/sports14050211), 2026-05-20
Supplement: s1 [file PROSPERO protocol.pdf › PROSPERO protocol.pdf]

## PROSPERO protocol — Methods

### Anticipated start–end dates

Start: 01 January 2016 (coverage of evidence) • End (search coverage): 22 December 2024

(Registration date will be set by PROSPERO; the conduct of the review should be prospective to registration.)

### Review question

Among individuals following **primary anterior cruciate ligament reconstruction (ACL-R)**, what is the **prevalence (pass rate) on return-to-sport test batteries (RTS-TB) that include quadriceps testing and more than two hop tests**, when the RTS-TB outcome is reported dichotomously as **pass/fail**?

### Objective(s)

- 1) To estimate pooled pass rates on eligible RTS-TBs after primary ACL-R
- 2) To examine whether timing of testing is associated with pass rates.

### Eligibility criteria

#### Study designs

Observational studies eligible for JBI appraisal tools (e.g., cross-sectional, cohort).

**Exclude:** case studies, systematic reviews, clinical commentaries.

#### Participants

Humans following **primary ACL-R**; studies with **exclusively paediatric populations (≤16 years)** excluded.

#### Interventions/Index tests (Exposure)

RTS-TB that **must** include: (i) **quadriceps testing** and (ii) **>2 hop tests**.

#### Comparators

Not required (single-group prevalence).

#### Outcomes

Primary: **RTS-TB pass rate** reported as a **single dichotomous outcome (pass/fail)**.

Secondary (for contextual/meta-regression only): **timing** of RTS-TB administration (post-operative month).

#### Setting

Any.

#### Time frame

Publications **01 Jan 2016–22 Dec 2024** (chosen to capture post-guideline practice changes following Wright et al. [reference to be added]).

#### Language

**English-language** full text only.

#### Other exclusions

Studies reporting (1) **≥1 functional test OR ≥2 PROMs subjective tests only** (i.e., without meeting the required RTS-TB composition), (2) **≥8 separate clinical tests** as the construct (outside defined RTS-TB scope), (3) duplicate/overlapping cohorts (retain one; others narratively summarised).

## Information sources

Electronic databases: **AMED, CINAHL, MEDLINE, SPORTDiscus (EBSCO), PubMed.**

Additional: **Citation searching** of all studies included at full-text stage.

## Dates searched

Comprehensive search run **22 Dec 2024.**

## Limits/filters

Peer-reviewed journals; exclude systematic reviews.

## Reference management

**Covidence** (screening/data extraction management) and **EndNote 3** (de-duplication & records).

## Search strategy

Search terms developed in **EBSCO** syntax using **PICO-informed keywords**, adapted (not modified) for PubMed.

- Concepts combined with **AND**; synonyms within concepts combined with **OR**.
- Field limits: **Title/Abstract**.
- Full strategies to be provided in **Appendix** (Table of terms and exact strings per database).

Two reviewers conducted the initial database search; **citation searching** completed by one reviewer.

## Study selection

- **Screening tool:** Covidence.
- **Process:** Two reviewers will **independently** screen titles/abstracts, then full texts, against prespecified criteria.
- **Disagreements** resolved by discussion; where needed, adjudication by a third team member.
- **Deduplication:** EndNote 3 followed by Covidence import checks.
- **PRISMA** flow diagram to document study selection (PRISMA 2020 checklist framework).

## Data extraction

- **Tool:** Covidence data extraction template.
- **Extracted items:** study characteristics (design, setting, country), participant details, ACL-R details if reported, **RTS-TB composition**, definition of **pass/fail**, **numbers passing/total**, **timing** of test administration, notes on overlapping cohorts.
- **Process:** Two reviewers extract independently with consensus resolution.

## Risk of bias (individual studies)

- **Tool:** Joanna Briggs Institute (JBI) critical appraisal tools for observational designs.
- **Judgement:** Converted to **three-tier classification (low / moderate / high)** per study, analogous to Newcastle–Ottawa conceptual levels.
- **Assessors:** Two reviewers independently; consensus resolution.

## Data synthesis and statistical methods

### Primary synthesis

- Effect measure: **proportion passing RTS-TB** (percentage).
- Meta-analysis: **random-effects proportion meta-analysis** to pool pass rates.
- **Software:** Stata 18.5 (United Kingdom).
- **Overlapping cohorts:** Where overlapping populations are identified, include only the most comprehensive/non-overlapping dataset in quantitative synthesis; report others in **narrative synthesis**.

### Heterogeneity

- Assess statistical heterogeneity (e.g.,  $I^2$ ,  $\chi^2$ ). Explore clinical/methodological sources qualitatively (differences in RTS-TB composition, timing).

### Meta-regression / subgroup analyses

- **Planned meta-regression:** **Timing** of RTS-TB (months post-op) as a continuous predictor of pass rate.
- (If data permit) sensitivity analyses by **risk of bias tier** and by **RTS-TB composition**.

### Small-study effects/publication bias

- If  $\geq 10$  studies, assess small-study effects (visual inspection; appropriate tests for proportion meta-analysis if applicable).

### Narrative synthesis

- For studies not meta-analysed (e.g., overlapping cohorts), provide structured narrative summary.

### Certainty of evidence

- **GRADE** approach tailored to **prevalence estimates** to rate certainty (very low to high) across key domains (risk of bias, inconsistency, indirectness, imprecision, publication bias).

### Equity, diversity, and inclusion

- The **three-person** team includes members from **academic, public, and private sectors** and contributors from **under-represented groups** (BAME and female).
- Inclusion aims: participants with ACL injury **regardless of gender, socioeconomic status, country of origin, or sport level**, subject to eligibility criteria.

### Reporting and registration

- Reporting will follow the **PRISMA 2020** checklist.
- Any protocol amendments post-registration will be documented with dates and rationale.
